# Supplementary material for: An effective fingerprint orientation field estimation method using differential values of grayscale intensity
Source: PeerJ journal article supplement (doi:10.7717/peerj-cs.1342), 2023-04-17
Supplement: Raw_datas.zip [file Raw_datas.xlsx]

## Sheet: Raw Datas
Raw Datas
Original Fingerprints	Block1	Block2	Block3	Block4	Block5	Block6	Block7	Block8	Block9	Block10	Block11	Block12	Block13	Block14	Block15	Block16	Block17	Block18	Block19	Block20	Block21	Block22	Block23	Block24	Block25	Block26	Block27	Block28	Block29	Block30	Block31	Block32	Block33	Block34	Block35	Block36	Block37	Block38	Block39	Block40	Block41	Block42	Block43	Block44	Block45	Block46	Block47	Block48	Block49
Proposed OF Estimation	58.855	53.573	51.52	42.223	35.415	29.745	33.083	23.343	18.023	16.743	50.611	46.133	51.733	41.249	29.682	29.377	28.772	26.101	18.992	15.179	38.194	46.701	49.258	45.539	37.531	35.137	26.59	21.259	19.559	13.13	49.059	55.108	50.244	45.868	39.798	34.416	24.888	30.627	23.055	22.759	55.645	55.589	55.692	45.747	33.364	40.885	38.076	25.113	22.449
Gradient Based OF Estimation	53.306	51.929	47.96	43.734	40.995	36.329	34.708	31.076	22.977	21.895	45.087	41.574	47.397	42.29	36.428	35.656	35.082	33.047	24.542	21.039	40.764	45.211	46.592	43.302	40.989	39.164	33.224	23.813	23.219	18.469	47.547	50.677	47.762	45.612	42.39	36.676	31.036	29.019	31.346	23.815	51.354	50.578	51.256	45.938	39.763	42.717	39.993	28.253	27.015
PSD Based OF Estimation	56.31	56.31	45	45	56.31	33.69	33.69	18.435	18.435	18.435	45	56.31	45	45	33.69	33.69	33.69	33.69	33.69	18.435	45	45	56.31	45	45	45	90	18.435	18.435	18.435	45	56.31	45	45	45	33.69	33.69	90	33.69	18.435	45	45	56.31	45	33.69	45	45	26.565	33.69
Blurring Fingerprints	Block1	Block2	Block3	Block4	Block5	Block6	Block7	Block8	Block9	Block10	Block11	Block12	Block13	Block14	Block15	Block16	Block17	Block18	Block19	Block20	Block21	Block22	Block23	Block24	Block25	Block26	Block27	Block28	Block29	Block30	Block31	Block32	Block33	Block34	Block35	Block36	Block37	Block38	Block39	Block40	Block41	Block42	Block43	Block44	Block45	Block46	Block47	Block48	Block49
Proposed OF Estimation	57.78	54.842	53.845	44.948	43.28	31.245	33.357	24.046	19.973	17.127	46.971	45.445	51.541	40.942	29.261	30.022	28.504	26.166	18.779	13.429	36.1	46.279	49.975	45.877	38.025	34.457	27.693	20.89	19.308	12.151	46.066	54.463	50.109	45.573	38.84	33.903	25.268	30.467	23.23	19.887	54.841	56.021	56.197	45.875	33.743	40.785	39.921	24.327	22.407
Gradient Based OF Estimation	51.455	53.359	49.306	45.681	44.478	38.724	34.666	32.022	23.719	21.209	41.794	39.903	47.097	41.803	36.852	35.642	35.109	33.074	25.186	20.774	37.328	45.534	47.15	43.328	41.418	38.428	33.964	23.208	22.661	17.893	45.381	50.085	47.258	45.302	42.131	36.535	30.398	27.423	33.004	22.093	50.856	50.838	51.264	45.935	41.213	42.993	39.954	27.323	26.455
PSD Based OF Estimation	56.31	56.31	45	45	56.31	33.69	45	33.69	18.435	18.435	45	56.31	45	45	33.69	33.69	33.69	33.69	33.69	18.435	45	45	56.31	45	45	45	90	18.435	18.435	18.435	45	56.31	45	45	45	33.69	33.69	90	33.69	18.435	45	45	45	45	33.69	45	45	90	33.69
Noise Fingerprints	Block1	Block2	Block3	Block4	Block5	Block6	Block7	Block8	Block9	Block10	Block11	Block12	Block13	Block14	Block15	Block16	Block17	Block18	Block19	Block20	Block21	Block22	Block23	Block24	Block25	Block26	Block27	Block28	Block29	Block30	Block31	Block32	Block33	Block34	Block35	Block36	Block37	Block38	Block39	Block40	Block41	Block42	Block43	Block44	Block45	Block46	Block47	Block48	Block49
Proposed OF Estimation	51.082	50.938	49.03	43.394	48.796	59.889	46.654	46.489	29.005	40.251	77.45	48.615	46.618	49.161	42.494	43.259	45.743	65.794	49.695	47.559	59.539	49.644	49.558	47.757	49.283	50.32	48.627	41.845	40.445	43.243	59.733	51.678	51.152	44.732	49.332	48.451	48.043	44.408	42.773	44.989	54.032	49.686	58.678	52.081	43.059	53.98	59.089	42.778	49.823
Gradient Based OF Estimation	18.631	46.783	41.919	32.367	47.932	58.991	111.589	53.41	86.943	23.103	158.737	37.244	23.268	145.818	52.59	22.664	41.761	47.681	54.213	72.15	55.629	78.648	41.884	48.856	42.914	38.877	14.86	43.292	76.572	40.834	79.939	119.434	85.213	23.019	22.61	20.46	40.809	3.24	32.026	49.917	73.025	56.349	57.915	32.737	49.468	39.725	60.084	27.155	24.3
PSD Based OF Estimation	45	45	45	45	90	180	45	146.31	90	168.69	63.435	90	180	180	99.462	45	45	135	180	90	45	45	45	90	180	45	26.565	45	135	135	45	90	45	135	45	63.937	56.31	90	33.69	180	70.956	45	45	63.435	26.565	56.31	71.565	135	26.565
Experiment Datas
Original Fingerprints	Block1	Block2	Block3	Block4	Block5	Block6	Block7	Block8	Block9	Block10	Block11	Block12	Block13	Block14	Block15	Block16	Block17	Block18	Block19	Block20	Block21	Block22	Block23	Block24	Block25	Block26	Block27	Block28	Block29	Block30	Block31	Block32	Block33	Block34	Block35	Block36	Block37	Block38	Block39	Block40	Block41	Block42	Block43	Block44	Block45	Block46	Block47	Block48	Block49
The OF Deviations Between Proposed and Gradient Based Algorithm	5.549	1.644	3.56	1.511	5.58	6.584	1.624	7.733	4.954	5.152	5.524	4.559	4.337	1.041	6.746	6.279	6.31	6.946	5.55	5.86	2.57	1.49	2.666	2.237	3.458	4.027	6.634	2.553	3.661	5.339	1.512	4.43	2.482	0.256	2.592	2.259	6.149	1.608	8.291	1.056	4.291	5.011	4.436	0.191	6.399	1.832	1.917	3.139	4.566
The OF Deviations Between PSD and Gradient Based Algorithm	3.004	4.381	2.96	1.266	15.315	2.638	1.018	12.641	4.542	3.46	0.087	14.736	2.397	2.71	2.738	1.966	1.392	0.643	9.148	2.604	4.236	0.211	9.718	1.698	4.011	5.836	56.776	5.378	4.784	0.034	2.547	5.633	2.762	0.612	2.61	2.986	2.654	60.981	2.344	5.38	6.354	5.578	5.054	0.938	6.073	2.283	5.007	1.688	6.675
Original and Blurring Fingerprints	Block1	Block2	Block3	Block4	Block5	Block6	Block7	Block8	Block9	Block10	Block11	Block12	Block13	Block14	Block15	Block16	Block17	Block18	Block19	Block20	Block21	Block22	Block23	Block24	Block25	Block26	Block27	Block28	Block29	Block30	Block31	Block32	Block33	Block34	Block35	Block36	Block37	Block38	Block39	Block40	Block41	Block42	Block43	Block44	Block45	Block46	Block47	Block48	Block49
The OF Deviations Between Original and Blurring Fingerprint within Proposed Algorithm	1.075	1.27	2.325	2.726	7.864	1.501	0.273	0.703	1.95	0.384	3.639	0.688	0.192	0.308	0.421	0.645	0.268	0.065	0.214	1.75	2.094	0.422	0.717	0.338	0.494	0.681	1.104	0.369	0.251	0.979	2.992	0.645	0.135	0.295	0.958	0.513	0.38	0.16	0.175	2.872	0.804	0.433	0.505	0.128	0.38	0.1	1.845	0.786	0.042
The OF Deviations Between Original and Blurring Fingerprint within Gradient Based Algorithm	1.851	1.43	1.346	1.947	3.483	2.395	0.042	0.946	0.742	0.686	3.293	1.671	0.3	0.487	0.423	0.014	0.027	0.028	0.644	0.265	3.435	0.323	0.558	0.027	0.429	0.737	0.74	0.604	0.558	0.576	2.165	0.592	0.504	0.31	0.259	0.141	0.638	1.596	1.658	1.722	0.498	0.261	0.007	0.003	1.451	0.276	0.039	0.93	0.559
The OF Deviations Between Original and Blurring Fingerprint within PSD Based Algorithm	0	0	0	0	0	0	11.31	15.255	0	0	0	0	0	0	0	0	0	0	0	0	0	0	0	0	0	0	0	0	0	0	0	0	0	0	0	0	0	0	0	0	0	0	11.31	0	0	0	0	63.435	0
Original and Noise Fingerprints	Block1	Block2	Block3	Block4	Block5	Block6	Block7	Block8	Block9	Block10	Block11	Block12	Block13	Block14	Block15	Block16	Block17	Block18	Block19	Block20	Block21	Block22	Block23	Block24	Block25	Block26	Block27	Block28	Block29	Block30	Block31	Block32	Block33	Block34	Block35	Block36	Block37	Block38	Block39	Block40	Block41	Block42	Block43	Block44	Block45	Block46	Block47	Block48	Block49
The OF Deviations Between Original and Noise Fingerprint within Proposed Algorithm	6.414	2.617	3.461	1.529	10.57	29.853	14.697	22.663	9.376	22.399	30.543	9.284	5.578	10.176	12.727	11.2	17.474	39.38	29.709	32.528	22.523	3.176	1.227	1.121	13.161	16.63	16.131	21.646	20.94	31.105	12.292	2.445	0.696	2.943	6.968	14.548	23.172	16.101	18.436	25.096	2.095	6.983	1.304	6.321	8.427	12.533	21.439	19.589	27.248
The OF Deviations Between Original and Noise Fingerprint within Gradient Based Algorithm	34.675	5.146	6.041	11.367	6.937	22.662	76.882	22.334	63.966	1.209	113.65	4.331	24.128	103.528	16.161	12.992	6.679	14.634	29.67	51.111	14.865	33.437	4.708	5.555	1.925	0.287	18.363	19.479	53.352	22.365	32.393	68.756	37.451	22.593	19.78	16.216	9.772	25.779	0.679	26.103	21.671	5.771	6.659	13.201	9.706	2.992	20.091	1.097	2.715
The OF Deviations Between Original and Noise Fingerprint within PSD Based Algorithm	11.31	11.31	0	0	33.69	146.31	11.31	127.875	71.565	150.255	18.435	33.69	135	135	65.772	11.31	11.31	101.31	146.31	71.565	0	0	11.31	45	135	0	63.435	26.565	116.565	116.565	0	33.69	0	90	0	30.247	22.62	0	0	161.565	25.956	0	11.31	18.435	7.125	11.31	26.565	108.435	7.125
Error Blocks of OF Estimation	Image1	Image2	Image3	Image4	Image5	Image6	Image7	Image8	Image9	Image10	Image11	Image12	Image13	Image14	Image15
Total Numbers of Error Blocks within Proposed Algorithm	0	10	0	1	1	6	4	0	0	1	0	6	23	15	0
Numbers in Edge Area of Error Blocks within Proposed Algorithm	0	4	0	0	1	4	3	0	0	1	0	6	14	9	0
Numbers in Core Area of Error Blocks within Proposed Algorithm	0	1	0	0	0	0	0	0	0	0	0	0	0	1	0
Numbers in Other Area of Error Blocks within Proposed Algorithm	0	5	0	1	0	2	1	0	0	0	0	0	9	5	0
Total Numbers of Error Blocks within PSD Based Algorithm	5	12	13	5	6	20	4	0	10	0	4	9	22	8	1
Numbers in Edge Area of Error Blocks within PSD Based Algorithm	4	3	2	3	1	10	2	0	8	0	4	7	11	6	0
Numbers in Core Area of Error Blocks within PSD Based Algorithm	0	3	2	0	0	2	0	0	0	0	0	0	0	0	0
Numbers in Other Area of Error Blocks within PSD Based Algorithm	1	6	9	2	5	8	2	0	2	0	0	2	11	2	1
[truncated: 1,451 more columns]
